# Supplementary material for: Improving carotenoid production in recombinant yeast, Saccharomyces cerevisiae, using ultrasound‐irradiated two‐phase extractive fermentation
Source: PubMed Central journal article supplement (PMC8727735; doi:10.1002/elsc.202100051), 2021-10-29
Supplement: ELSC-22-4-s001.pdf [file ELSC-22-4-s001.pdf]

**Improving carotenoid production in recombinant yeast, *Saccharomyces cerevisiae*, using ultrasound-irradiated two-phase extractive fermentation**

**Supplementary Figure**

| Ultrasonic intensity [W] | Cultivation time [h]                                                                |                                                                                      |                                                                                       |
|--------------------------|-------------------------------------------------------------------------------------|--------------------------------------------------------------------------------------|---------------------------------------------------------------------------------------|
|                          | 24                                                                                  | 48                                                                                   | 96                                                                                    |
| 0                        |  |  |  |
| 10                       |  |  |  |
| 80                       |  |  |  |
| 150                      |  |  |  |

**Fig. 1S. State of the culture medium during ultrasonic-irradiated extractive fermentation with isopropyl myristate.**

(A)

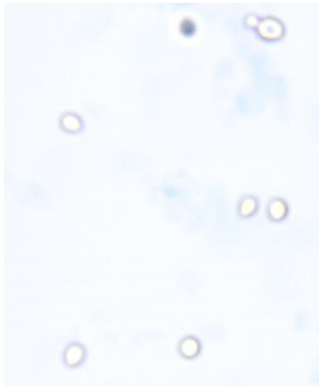

(B)

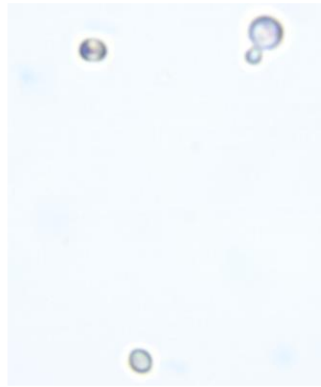

(C)

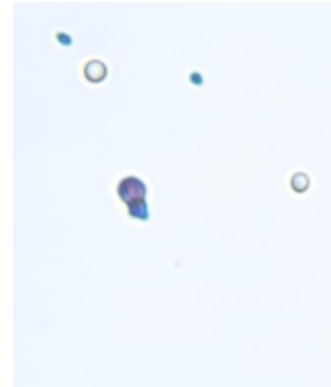

**Fig. 2S. Morphological change of the cells during ultrasonic-irradiated extractive fermentation with isopropyl myristate. A) After 24 h fermentation. B) After 48 h fermentation. C) After 96 h fermentation.** The images were acquired by a 400x phase contrast microscope after staining with methylene blue.
